# Supplementary material for: A label-free SERRS-based nanosensor for ultrasensitive detection of mercury ions in drinking water and wastewater effluent
Source: Royal Society of Chemistry journal article supplement (doi:10.1039/c6ay02361d), 2016-11-22
Supplement: c6ay02361d1.pdf [file c6ay02361d1.pdf]

Supporting information for

# **Label-free SERRS-based nanosensor for ultrasensitive detection of mercury ions in drinking water and wastewater effluent**

Dan Song<sup>1</sup>, Rong Yang<sup>1</sup>, Haoyu Wang<sup>1</sup>, Wei Li<sup>1</sup>, Hongchen Wang<sup>1</sup>, Hui Long<sup>2</sup>, Feng Long<sup>1\*</sup>

<sup>1</sup>*School of Environment and Natural Resources, Renmin University of China, 100872, Beijing*

<sup>2</sup>*Institute of Product Quality Inspection, Guangxi Zhuang Autonomous Region*

\*Corresponding author: [longf04@ruc.edu.cn](mailto:longf04@ruc.edu.cn)

**Figure S1.** SEM and TEM image of  $\text{Fe}_3\text{O}_4@Ag$  magnetic beads

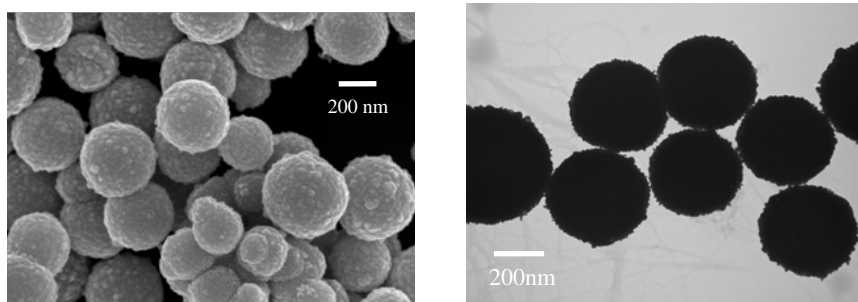

**Figure S2** Magnetic hysteresis curves of  $\text{Fe}_3\text{O}_4$ ,  $\text{Fe}_3\text{O}_4@ \text{SiO}_2$ -Au seed, and  $\text{Fe}_3\text{O}_4@ \text{SiO}_2@Ag$  at 300 K

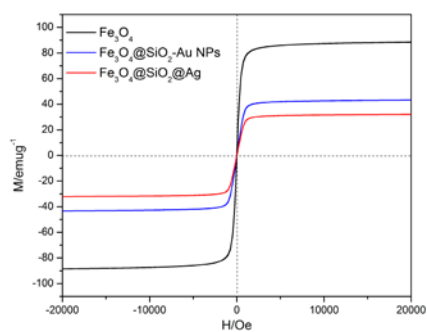

**Figure S3.** The effect of incubation time between MG and  $\text{Fe}_3\text{O}_4@Ag$  on the SERS intensity of MG.

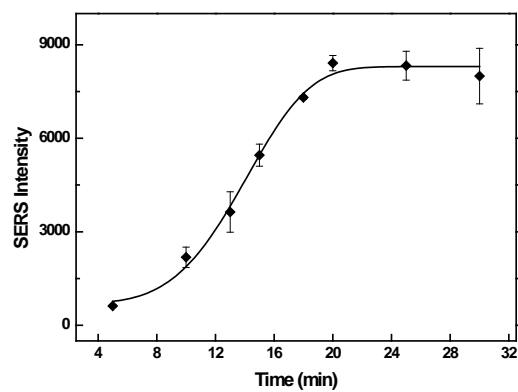

**Figure S4.** Effect of pH on the SERRS intensity of MG ( $10^{-5}$  mol/L).

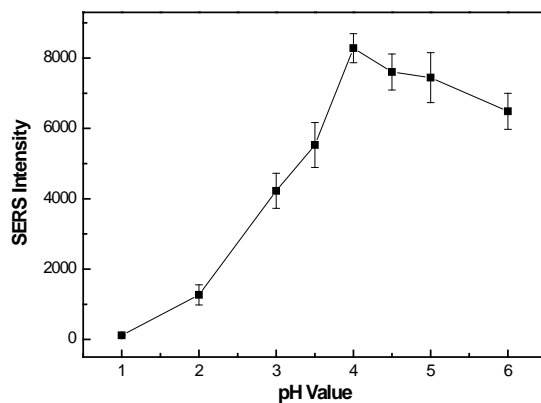

**Figure S5.** Replicate SERS spectra of MG system in the presence of  $\text{Hg}^{2+}$  with concentration of  $10^{-8}$  mol/L(A) and  $10^{-6}$  mol/L(B).

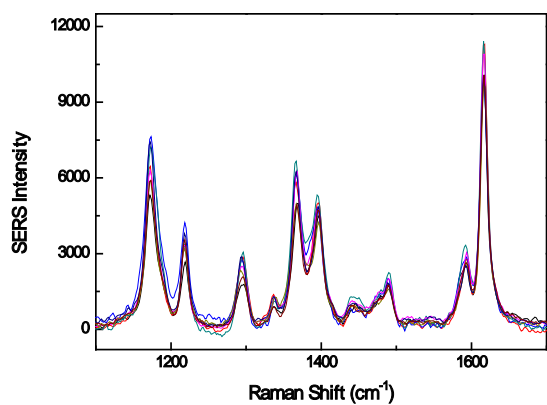

A

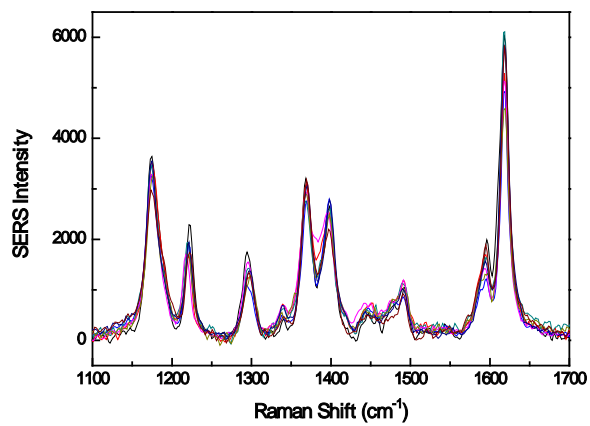

B
